# Supplementary material
Source: publisher figshare collection journal article supplement (https://asha.figshare.com/articles/dataset/_/24317110)
Supplement: Supplementary file 1 [file 1]

**Supplemental Material S4.** Significant practice differences based on geography.

*This table highlights significant practice differences between respondents based on their geographical location.*

| <b>USA more/most likely to do this than either/or Ireland/UK or Australia/NZ</b> | <b>Mean<br/>Ireland/UK</b> | <b>Mean<br/>Australia/NZ</b> | <b>Mean<br/>USA</b> |
|----------------------------------------------------------------------------------|----------------------------|------------------------------|---------------------|
| Assessment of reflexive cough                                                    | 2.3                        | 2.2                          | 2.8                 |
| Assessment of vallecular residue                                                 | 2.1                        | 2.2                          | 2.6                 |
| Postural trials on thin fluids                                                   | 2.3                        | 2.5                          | 2.7                 |
| Ability to perform/impact of various physical maneuvers                          | 2.5                        | 2.3                          | 2.8                 |
| Ability to perform swallow maneuvers                                             | 2.0                        | 2.0                          | 2.7                 |
| Conduct a VSS assessment                                                         | 2.0                        | 2.2                          | 2.5                 |
| Education of PwD re research evidence                                            | 2.6                        | 2.8                          | 2.9                 |
| Education of PwD re patient evidence                                             | 2.0                        | 2.2                          | 2.6                 |
| <b>Australia less likely to do this than either/or Ireland/UK or USA</b>         |                            |                              |                     |
| Assessment of voluntary cough                                                    | 2.7                        | 2.4                          | 2.8                 |
| Evaluation of cognition                                                          | 2.8                        | 2.4                          | 2.8                 |
| <b>Ireland/UK less likely to do than USA and Australia</b>                       |                            |                              |                     |
| Assessment of gag reflex                                                         | 1.2                        | 1.7                          | 1.7                 |
