# Supplementary material
Source: publisher figshare collection journal article supplement (https://asha.figshare.com/articles/dataset/_/24317110)
Supplement: Supplementary file 2 [file 1]

**Supplemental Material S7.** Significant influence differences based on respondent characteristics.

*This table highlights additional significant ( $p < .001$ ) influence differences between respondents.*

| <b>Australia more influenced by this than USA and/or Ireland/UK</b>                                                | <b>Mean<br/>Ireland/UK</b>  | <b>Mean<br/>Australia/NZ</b>            | <b>Mean<br/>USA</b>          |
|--------------------------------------------------------------------------------------------------------------------|-----------------------------|-----------------------------------------|------------------------------|
| Presence of penetration                                                                                            | 2.3                         | 2.7                                     | 1.9                          |
| Age of the PwD                                                                                                     | 2.0                         | 2.7                                     | 2.3                          |
| <b>Ireland/UK less influenced by this than USA or Australia/NZ</b>                                                 |                             |                                         |                              |
| Volume of aspiration                                                                                               | 2.6                         | 2.8                                     | 2.9                          |
| <b>Those working &lt;5 years more influenced by this than those working between 5-10 years and/or &gt;10 years</b> |                             |                                         |                              |
|                                                                                                                    | <b>Mean<br/>&lt;5 years</b> | <b>Mean<br/>Between 5–<br/>10 years</b> | <b>Mean<br/>&gt;10 years</b> |
| Presence of penetration                                                                                            | 2.5                         | 2.2                                     | 2.0                          |
| Presence of cough post swallow                                                                                     | 2.9                         | 2.7                                     | 2.5                          |
| Opinion of colleagues                                                                                              | 2.4                         | 2.0                                     | 1.8                          |
| <b>Hospital-based SLPs more influenced by this than community-based SLPs and or Rehabilitation SLPs</b>            |                             |                                         |                              |
|                                                                                                                    | <b>Mean<br/>Community</b>   | <b>Mean<br/>Rehabilitation</b>          | <b>Mean<br/>Hospital</b>     |
| Opinion of colleagues                                                                                              | 1.9                         | 2.0                                     | 2.4                          |
