# Supplementary material
Source: publisher figshare collection journal article supplement (https://asha.figshare.com/articles/dataset/_/24317110)
Supplement: Supplementary file 3 [file 1]

**Supplemental Material S5.** Significant practice differences based on respondent characteristics.

*This table highlights additional significant ( $p < .001$ ) practice differences based on respondent characteristics.*

|                                                                                                                        | Mean                     | Mean                        | Mean                     |
|------------------------------------------------------------------------------------------------------------------------|--------------------------|-----------------------------|--------------------------|
| <b>Those working shortest time least likely to do this</b>                                                             | <b>&lt; 5 yrs</b>        | <b>Between 5–10 yrs</b>     | <b>&gt;10 yrs</b>        |
| Assessment of vallecular residue                                                                                       | 1.8                      | 2.3                         | 2.4                      |
| Ability to perform various physical maneuvers                                                                          | 2.3                      | 2.5                         | 2.7                      |
| Conduct a VSS assessment                                                                                               | 1.9                      | 2.2                         | 2.3                      |
| Education of the PwD re research evidence                                                                              | 2.4                      | 2.8                         | 2.8                      |
| <b>Hospital-based SLPs are more likely to do this than community and/or rehabilitation SLPs</b>                        | <b>Community</b>         | <b>Rehabilitation</b>       | <b>Hospital</b>          |
| Assessment of vallecular residue                                                                                       | 1.7                      | 2.3                         | 2.4                      |
| Ability to perform swallow maneuvers                                                                                   | 2.0                      | 2.6                         | 2.3                      |
| Conduct a VSS assessment                                                                                               | 1.8                      | 1.9                         | 2.6                      |
| Conduct a FEES assessment                                                                                              | 1.3                      | 1.5                         | 1.7                      |
|                                                                                                                        | <b>Seldom/never</b>      | <b>Sometimes</b>            | <b>Frequently/always</b> |
| <b>Those who most often conduct a VSS more likely to do this</b>                                                       |                          |                             |                          |
| Assessment of vallecular residue                                                                                       | 2.0                      | 2.3                         | 2.6                      |
| Conduct a FEES assessment                                                                                              | 1.3                      | 1.3                         | 2.8                      |
|                                                                                                                        | <b>Limited/no access</b> | <b>Sometimes can access</b> | <b>Full access</b>       |
| <b>Those who have more access to FEES more likely to do this</b>                                                       |                          |                             |                          |
| Assessment of vallecular residue                                                                                       | 2.0                      | 2.3                         | 2.5                      |
| Ability to perform swallow maneuvers                                                                                   | 2.1                      | 2.2                         | 2.5                      |
| Conduct a VSS assessment                                                                                               | 1.9                      | 2.3                         | 2.6                      |
| Conducting a FEES assessment                                                                                           | 1.0                      | 1.4                         | 2.2                      |
|                                                                                                                        | <b>None</b>              | <b>Between 1–2</b>          | <b>More than 3</b>       |
| <b>Those who attended more training events (e.g., seminars/conferences) in the last 3 years more likely to do this</b> |                          |                             |                          |
| Postural trials on thin fluids                                                                                         | 1.9                      | 2.3                         | 2.6                      |
| Ability to perform swallow maneuvers                                                                                   | 1.4                      | 2.1                         | 2.4                      |
| Conduct a VSS assessment                                                                                               | 1.4                      | 2.1                         | 2.3                      |

|                                                                                         | Limited/no<br>confidence | Some<br>confidence         | High<br>confidence |
|-----------------------------------------------------------------------------------------|--------------------------|----------------------------|--------------------|
| <b>Those who are more confident in their<br/>knowledge of TL more likely to do this</b> |                          |                            |                    |
| Assessment of vallecular residue                                                        | 1.4                      | 2.0                        | 2.3                |
|                                                                                         | <b>&lt;25%</b>           | <b>Between<br/>25%–50%</b> | <b>&gt;50%</b>     |
| <b>Those whose caseload has higher<br/>numbers of PwD more likely to do this</b>        |                          |                            |                    |
| Conduct a VSS assessment                                                                | 1.6                      | 1.9                        | 2.3                |

---
