# Supplementary material
Source: publisher figshare collection journal article supplement (https://asha.figshare.com/articles/dataset/_/24317110)
Supplement: Supplementary file 4 [file 1]

**Supplemental Material S2.** Significant SLP beliefs and propensity to recommend TL.

*This table highlights significant findings ( $p < .001$ ) regarding the interaction of SLPs propensity to recommend TL and their beliefs regarding the intervention.*

| <b>Those who most often and sometimes recommend TL are more likely to agree with the following statements:</b> | <b>Mean<br/>Seldom/Never<br/>Recommend</b> | <b>Mean<br/>Sometimes<br/>Recommend</b> | <b>Mean<br/>Frequently/Always<br/>Recommend</b> |
|----------------------------------------------------------------------------------------------------------------|--------------------------------------------|-----------------------------------------|-------------------------------------------------|
| TL is an evidence-based intervention                                                                           | 1.6                                        | 2.2                                     | 2.4                                             |
| TL is an effective treatment                                                                                   | 1.7                                        | 2.4                                     | 2.8                                             |
| TL is supported by clinical evidence                                                                           | 1.7                                        | 2.3                                     | 2.4                                             |
| TL prevents/reduces aspiration                                                                                 | 1.5                                        | 2.1                                     | 2.6                                             |
| TL should be the standard of care for treatment of aspiration                                                  | 1.1                                        | 1.3                                     | 1.5                                             |
| TL is the best available treatment for aspiration                                                              | 1.1                                        | 1.3                                     | 1.6                                             |
| I have a duty of care to provide TL to patients who are aspirating                                             | 1.2                                        | 1.6                                     | 2.1                                             |
| TL makes swallowing safer                                                                                      | 1.6                                        | 2.3                                     | 2.1                                             |
| TL prevents pneumonia                                                                                          | 1.2                                        | 1.6                                     | 2.0                                             |
| There are no better options to TL                                                                              | 1.1                                        | 1.6                                     | 1.9                                             |
| TL ensures PwD get some oral intake                                                                            | 1.7                                        | 2.3                                     | 2.7                                             |
| TL aligns with neuroplasticity principles                                                                      | 1.3                                        | 1.7                                     | 1.9                                             |
| I would choose TL for my family member                                                                         | 1.6                                        | 2.4                                     | 2.5                                             |
| I would choose TL for myself if needed                                                                         | 1.4                                        | 2.0                                     | 2.0                                             |
| I would recommend TL even if the PwD/family do not want it                                                     | 1.1                                        | 1.6                                     | 1.8                                             |
| Most PwD are happy with TL                                                                                     | 1.1                                        | 1.5                                     | 1.6                                             |
| Most patients adhere to TL recommendations                                                                     | 1.3                                        | 1.8                                     | 1.9                                             |
| TL provides comfort for the family                                                                             | 1.7                                        | 2.1                                     | 2.3                                             |
| TL reduces stress/discomfort of drinking                                                                       | 1.8                                        | 2.3                                     | 2.5                                             |
| TL improves quality of life for PwD                                                                            | 1.5                                        | 2.0                                     | 2.0                                             |
