# Supplementary material
Source: publisher figshare collection journal article supplement (https://asha.figshare.com/articles/dataset/_/24317110)
Supplement: Supplementary file 5 [file 1]

**Supplemental Material S3.** Additional significant belief differences between respondents.

*This table highlights additional significant ( $p < .001$ ) belief differences between respondents.*

| <b>Those who live in Australia/New Zealand more likely to agree with the following statements</b>                                                   | <b>Mean<br/>Australia/NZ</b>           | <b>Mean<br/>Ireland/UK</b>             | <b>Mean<br/>USA</b>                  |
|-----------------------------------------------------------------------------------------------------------------------------------------------------|----------------------------------------|----------------------------------------|--------------------------------------|
| TL is an evidence-based treatment                                                                                                                   | 2.48                                   | 1.88                                   | 2.22                                 |
| TL is an effective treatment                                                                                                                        | 2.72                                   | 2.29                                   | 2.22                                 |
| TL is supported by clinical evidence                                                                                                                | 2.61                                   | 2.03                                   | 2.22                                 |
| TL makes swallowing safer for PwD                                                                                                                   | 2.61                                   | 2.06                                   | 1.96                                 |
| TL ensures some PwD get some oral intake                                                                                                            | 2.71                                   | 2.21                                   | 2.12                                 |
| <b>Those who attend less training events (e.g., seminars/conferences) in the last 3 years are more likely to agree with the following statement</b> | <b>Mean<br/>Attend no<br/>seminars</b> | <b>Mean<br/>Attend<br/>between 1–2</b> | <b>Mean<br/>Attend 3 or<br/>more</b> |
| TL is the best treatment for aspiration                                                                                                             | 1.88                                   | 1.33                                   | 1.06                                 |
| <b>Those with smallest dysphagia caseload more likely to agree with the following statement</b>                                                     | <b>Mean<br/>&lt;25%</b>                | <b>Mean<br/>Between<br/>25%–50%</b>    | <b>Mean<br/>&gt;50%</b>              |
| TL prevents pneumonia for PwD                                                                                                                       | 2.24                                   | 1.82                                   | 1.49                                 |
