# Supplementary material
Source: publisher figshare collection journal article supplement (https://asha.figshare.com/articles/dataset/_/24317110)
Supplement: Supplementary file 6 [file 1]

**Supplemental Material S8.** Significant evidence and effectiveness beliefs and discontinuation tendencies.

*This tables highlights the significant ( $p < .001$ ) interaction between SLPs beliefs regarding evidence and effectiveness and their tendency to discontinue the TL treatment.*

| <b>Those who most agree that TL is an evidence-based intervention are less likely to discontinue TL intervention under this circumstance</b> | <b>Mean Disagree</b> | <b>Mean Neither agree nor disagree</b> | <b>Mean Agree</b> |
|----------------------------------------------------------------------------------------------------------------------------------------------|----------------------|----------------------------------------|-------------------|
| The PwD is dehydrated                                                                                                                        | 2.8                  | 2.5                                    | 2.3               |
| Quality of life negatively impacted                                                                                                          | 2.9                  | 2.7                                    | 2.7               |
| Implementation of other treatment options                                                                                                    | 2.8                  | 2.5                                    | 2.2               |
| Non-compliance with recommendation by PwD/carer                                                                                              | 2.6                  | 2.3                                    | 2.1               |
| The PwD wishes to discontinue TL                                                                                                             | 2.9                  | 2.8                                    | 2.6               |
| PwD is discharged from hospital/care                                                                                                         | 1.9                  | 1.6                                    | 1.4               |
| <b>Those who most agree that TL is an effective intervention are less likely to discontinue TL intervention under this circumstance</b>      |                      |                                        |                   |
| The PwD is dehydrated                                                                                                                        | 2.8                  | 2.6                                    | 2.3               |
| Implementation of other treatment options                                                                                                    | <b>2.8</b>           | <b>2.5</b>                             | <b>2.3</b>        |
| Non-compliance with recommendation by PwD/carer                                                                                              | 2.6                  | 2.3                                    | 2.2               |
| The PwD wishes to discontinue TL                                                                                                             | <b>3.0</b>           | <b>2.8</b>                             | <b>2.7</b>        |
| PwD is discharged from hospital/care                                                                                                         | 2.0                  | 1.6                                    | 1.4               |
