# Supplementary material
Source: publisher figshare collection journal article supplement (https://asha.figshare.com/articles/dataset/_/24317110)
Supplement: Supplementary file 7 [file 1]

**Supplemental Material S6.** Significant SLP influences and propensity to recommend TL.

*This table highlights significant ( $p < .001$ ) interaction of SLPs propensity to recommend TL and the influences on decisions to use TL.*

| <b>Those who most often recommend TL are more likely to be influenced than those who sometimes and/or frequently/always recommend by the following:</b> | <b>Mean<br/>Seldom/never<br/>recommend</b> | <b>Mean<br/>Sometimes<br/>recommend</b> | <b>Mean<br/>Frequently/always<br/>recommend</b> |
|---------------------------------------------------------------------------------------------------------------------------------------------------------|--------------------------------------------|-----------------------------------------|-------------------------------------------------|
| Presence of penetration                                                                                                                                 | 1.6                                        | 2.0                                     | 2.3                                             |
| Cough post-swallow                                                                                                                                      | 2.0                                        | 2.3                                     | 2.7                                             |
| Cough pre-swallow                                                                                                                                       | 2.4                                        | 2.6                                     | 2.9                                             |
| Performance on swallow trials with thin liquids                                                                                                         | 2.6                                        | 2.9                                     | 3.0                                             |
| Ease of use                                                                                                                                             | 2.1                                        | 1.7                                     | 2.2                                             |
| TL as a commonly employed practice                                                                                                                      | 1.2                                        | 1.7                                     | 2.3                                             |
| Staff familiarity with TL                                                                                                                               | 1.6                                        | 2.0                                     | 2.3                                             |
| Lack of alternative options                                                                                                                             | 1.7                                        | 2.3                                     | 2.6                                             |
| SLPs own positive experience with TL                                                                                                                    | 1.5                                        | 2.1                                     | 2.5                                             |
| Recommendations of experienced colleagues                                                                                                               | 1.5                                        | 2.0                                     | 2.4                                             |
| <b>Those who most often recommend TL are less likely to be influenced by the following:</b>                                                             |                                            |                                         |                                                 |
| Lack of supporting evidence for TL                                                                                                                      | <b>2.8</b>                                 | <b>2.6</b>                              | <b>2.1</b>                                      |
