# Supplementary material
Source: publisher figshare collection journal article supplement (https://asha.figshare.com/articles/dataset/_/24317110)
Supplement: Supplementary file 8 [file 1]

**Supplemental Material S9.** Significant discontinuation differences based on respondent characteristics.

*This table highlight additional significant ( $p < .001$ ) difference between respondents and discontinuation influences.*

| <b>Community-based SLPs less influenced by this than rehabilitation or hospital-based SLPs</b>      | <b>Mean<br/>Community</b>  | <b>Mean<br/>Rehabilitation</b>        | <b>Mean<br/>Hospital</b>   |
|-----------------------------------------------------------------------------------------------------|----------------------------|---------------------------------------|----------------------------|
| The PwD no longer aspirates                                                                         | 2.6                        | 2.9                                   | 2.9                        |
| <b>Those working longest less influenced by this than those working medium and/or shortest time</b> | <b>Mean<br/>&lt; 5 yrs</b> | <b>Mean<br/>Between 5–<br/>10 yrs</b> | <b>Mean<br/>&gt;10 yrs</b> |
| Implementation of other treatment options                                                           | 2.7                        | 2.6                                   | 2.3                        |
| <b>USA more influenced by this than Ireland/UK and/or Australia/NZ</b>                              | <b>Mean<br/>Ireland/UK</b> | <b>Mean<br/>Australia/NZ</b>          | <b>Mean<br/>USA</b>        |
| Cost to the PwD                                                                                     | 1.4                        | 1.7                                   | 1.9                        |
| Implementation of other treatment options                                                           | 2.2                        | 2.5                                   | 2.7                        |
